# Supplementary material
Source: MDPI journal article supplement (https://www.mdpi.com/2073-4336/4/4/776)
Supplement: s1 [file s1]

Supplementary Material

Experimental Instruction (Phase 1)

Instructions

Welcome!

You are about to participate in an experiment on interactive decision-making, funded by the R.O.C.K. (Research on Organizations, Coordination and Knowledge) research group of the University of Trento. Your privacy is guaranteed: results will be used and published anonymously.

All your earnings during the experiment will be expressed in **Experimental Currency Units** (ECUs)*.* Your earnings will depend on your performance in the experiment, according to the rules which we will explain to you shortly. You will be paid privately and in cash at the end of the experimental session. Other participants will not be informed about your earnings.

The experiment is divided in two, unrelated parts. The instructions for the second part will be distributed at the end of the first part. Your behavior and the earnings you obtain in the first part do not affect your earning in the second part in any way. The maximum you can earn in the experiment is
20 Euros.

PART 1

The experiment consists of 30 rounds; in each round you will face an interactive decision-making situation. The word “interactive” means that the outcome of your decision will be determined by your choice and by the choice of another participant, randomly chosen. More specifically, your earnings in each decision-making situation will be determined by the combination of your choice and the choice of the participant with whom you will be paired in that round.

Experimental Structure

The structure of each interactive decision problem, henceforth GAME, will be represented by a table like the one below.

|  | | **OTHER PLAYER’S ACTIONS (Column Player)** | |
| --- | --- | --- | --- |
| **C1** | **C2** |
| **YOUR ACTIONS (Row Player)** | **R1** | (6,4) | (4,7) |
| **R2** | (3,4) | (5,6) |

The table is to be read as follows: you and the participant with whom you are paired will play the roles, respectively, of ROW PLAYER and COLUMN PLAYER, or vice versa. The available choices of the ROW PLAYER are represented by the rows of the table (in the example, R1 and R2), and the available choices of the COLUMN PLAYER are represented by the columns of the table (in the example, C1 and C2).

If your role in a round is that of ROW PLAYER, the participant with whom you are paired will have the complementary role of COLUMN Player, and *vice versa*. You will learn your role by reading the labels on the table. The label “YOUR ACTIONS” will be placed close to your role, and the label “OTHER PLAYER’S ACTIONS” will be close to the role of the player you are paired with. For example, in a table like the one presented above, you have the role of ROW player, and the player with whom you are paired has the role of COLUMN player, so that the labels are inverted.

IMPORTANT: you will keep the same role (ROW or COLUMN) in all the decisional tables of the experiment, although the participant with whom you are paired will be picked randomly (and therefore may be different) in each round.

Each possible combination of choices of row and column player (i.e., each possible combination of rows and columns of the table) identifies one cell in the matrix. Each cell reports two numerical values in brackets. These values indicate the earnings (in Experimental Currency Units) of each participant associated with that combination of choices. Conventionally, the first number represents the earnings of the ROW PLAYER (regardless of whether it is you or the other player), and the second number represents the earnings of the COLUMN PLAYER.

For example: in the table below, if YOU, the ROW PLAYER, choose row R1 and the OTHER PLAYER chooses column C2, then your earnings will be those in the cell at the intersection between row R1 and column C2; YOU (ROW Player) earn 4 ECUs and the OTHER PLAYER (COLUMN PLAYER) 7 ECUs.

|  | | **OTHER PLAYER (Column Player)** | |
| --- | --- | --- | --- |
| **C1** | **C2** |
| **YOU (Row Player)** | **R1** | (6,4) | (4,7) |
| **R2** | (3,4) | (5,6) |

Bear in mind that you cannot directly choose the cell of the table, but only one of the rows or columns, depending on your role. Only the combination of both choices will select one and only one cell, corresponding to your earnings and to those of the other participant.

Matching Rules

For each decisional table, the participant with whom you are paired is randomly selected by the software. Obviously, as the matching rule is random and as the number of decisional tables larger than the number of participants in the session, during the experiment you will be paired more than once with the same subject. However, you will never know the identity of the participant you are matched with, nor will you know that person's choice in a table after you have made yours.

Information

In each of the 30 rounds, the screen will show the decisional table for that round, and you will be asked to make a decision. Each table is marked by a numerical code, which will be used for the final payment. The code appears in the top left-hand corner of each decisional table. The top right-hand corner of the screen specifies the time remaining for your decision. You must communicate your decision by typing 1, 2 or 3 in the space “I choose row/column number”, and by clicking the “confirm” button with the mouse.

In order for the next round to start, ALL participants must have entered their decision for the current round, and we therefore ask you not to take more than 30 seconds to choose. After 30 seconds, a text message in the top right-hand corner of the screen will ask you to write down your decision. If you delay your decision considerably, you will oblige the other players to wait.

You will face 30 decisional matrices, corresponding to 30 different interactive situations. There is no relation among your choices in the different games, each game is independent of the others. At the end of the 30th round, the first part of the experiment will be completed, and your earnings for this part will be determined.

Payments

Each matrix is identified by a code. Some tags have been placed in a box, each showing the code of one of the matrices. The experimenter will ask one of you, selected randomly, to verify that the box contains 30 tags, and also that the codes on the tags are really different from each other. Subsequently, the experimenter will ask a different participant, selected randomly, to pick five of these tags from the box. Each of you will be paid according to the earnings obtained in the tables corresponding to the extracted codes. The earnings in each of the five selected tables will be determined by matching your choice with the choice of the participant with whom you were matched at that table. As each of the 30 decisional tables of the experiment has a positive probability of being selected for payment, we ask you to devote the same attention to all of them.

Before the experiment starts, we will ask you to answer a simple anonymous questionnaire, in order to make sure that you have understood the instructions perfectly or whether clarifications are needed. If there are incorrect answers, the relevant part of the instructions will be repeated. After the questionnaire phase is completed, the experiment will start.

It is very important that you remain silent during the experiment, and that you never communicate with the other participants, either verbally, or in any other way. For any doubts or problems you may have, please just raise your hand and the experimenter will approach you. If you do not remain silent or if you behave in any way that could potentially disturb the experiment, you will be asked to leave the laboratory, and you will not be paid.

Thank you for your kind participation!

Questionnaire

Dear Participant,

The following questionnaire is anonymous and has the sole purpose of verifying your understanding of the rules of this experiment.

We ask you to answer to the following questions. If you are uncertain about how to respond, please consult the instructions sheet.

When you have finished, please raise your hand, a member of the staff will check your answers.

Thank you for your cooperation!

|  | **COLUMN Player** | | | |
| --- | --- | --- | --- | --- |
| **ROW Player** |  | **C1** | **C2** | **C3** |
| **R1** | 10,20 | 30,40 | 50,40 |
| **R2** | 1,2 | 3,4 | 6,3 |
| **R3** | 15,30 | 5,9 | 15,7 |

Suppose you are assigned the role of ROW PLAYER:

If the COLUMN PLAYER chooses strategy C2 and you choose strategy R2, how many ECUs will you earn? ........... And the other player? ...........

If you choose strategy R2, and COLUMN PLAYER chooses strategy C3, how many ECUs will that person earn? ........... And what about you? ...........

If the other player chooses C1, your earnings will be:

If you choose R1: ...........

If you choose R2: ...........

If you choose R3: ...........

Suppose you are assigned the role of COLUMN PLAYER

If the ROW PLAYER chooses strategy R2 and you choose strategy C1, how many experimental points will you earn? ........... And the other player? ...........

If the other player chooses R1, your earnings will be:

If you choose C1: ...........

If you choose C2: ...........

If you choose C3: ...........

Your role (as ROW or COLUMN PLAYER) in the rounds of the experiment will change:

TRUE or FALSE

The participant with whom you are paired will be determined randomly in each round, and you will never be matched more than once with the same participant.

TRUE or FALSE

After you have taken your decision on a table, you will be able to observe the choice of the participant with whom you were paired.

TRUE or FALSE

Experimental Instruction (Phase 2)

The sheet given to you shows 10 numbered ROWS, and each ROW presents 2 OPTIONS: **L** and **R**. We ask you to choose one and only one of the two options in each row. Your earnings will be determined in the following way.

This is a box containing 10 numbers, from 1 to 10, which will be used to determine your earnings. After you have made your choices, we will extract 2 numbers: the first number will determine the ROW that will be used to calculate your earnings, and the second number will determine your earnings given the OPTION, L or R, that you chose for that ROW. Obviously, each ROW has the same probability of being chosen, *i.e.*, 1 of out 10.

Now, pay attention to ROW 1. OPTION L pays 2 Euros if the number drawn is 1, and 1.60 Euros if the number drawn is a number between 2 and 10 (extremes included). OPTION R pays 3.85 Euros if the number drawn is 1, and 0.1 Euros if the number drawn is a number between 2 and 10 (extremes included). All the ROWS are similar, meaning that the earnings for both OPTIONS remain the same. The only difference is that, moving towards the bottom of the table, the possibility of winning the larger amount increases for both OPTIONS. Consequently, the possibility of winning the lower amount decreases. If ROW 10 is selected, there will be no need to extract the second number, because each OPTION will certainly pay the larger amount, that is, 2 Euro for OPTION L and
3.85 Euros for OPTION R.

L is the default option for all ROWS, but you can choose to switch to OPTION R by simply marking the desired ROW. If you prefer OPTION R from a certain point onwards, just mark the corresponding ROW. Please note that you can switch from L to R only once and that the switch is irreversible; therefore, you must mark only ONE ROW, which indicates that, in all the ROWS above, you prefer OPTION L, whereas in the marked ROW and in all ROWS below, you prefer OPTION R. If you do not want to change, *i.e.*, if you prefer OPTION L in all ROWS, don't mark anything. If you always prefer OPTION R, you must mark the first ROW. You can choose any of the 10 ROWS,
but you can only pass from L to R once, and therefore at most you can put one mark.

When you have finished, we will collect your sheet. When all participants have completed their choices, one of you will draw the two numbers from the box. Remember, the first extraction determines the ROW that will be used to calculate everybody’s earnings, and the second number will determine your earnings; the first number will be put back in the box before the second number is extracted. Your earnings in this choice task will be added to those obtained in the first part of the experiment, and the total amount will be paid to you privately at the end of the experiment.

EXAMPLE

Suppose that the ROW drawn randomly is ROW 3, and that you have marked one of the
rows below ROW 3. Since ROW 3 is above your mark, this indicates that you prefer OPTION L for ROW 3. Then, if the second drawn number is (for example) 5, your earnings are 1.6 Euros.

Questionnaire

Please answer the questions at the end of the sheet. We need this information for statistical
purposes only.

|  | **Option L** | **Switch from**  **L to R** | **Option R** |
| --- | --- | --- | --- |
| **ROW 1** | 2 € with 1 or 1.6 € with 2–10 |  | 3.85 € with 1 or 0.1 € with 2–10 |
| **ROW 2** | 2 € with 1–2 or 1.6 € with 3–10 |  | 3.85 € with 1–2 or 0.1 € with 3–10 |
| **ROW 3** | 2 € with 1–3 or 1.6 € with 4–10 |  | 3.85 € with 1–3 or 0.1 € with 4–10 |
| **ROW 4** | 2 € with 1–4 or 1.6 € with 5–10 |  | 3.85 € with 1–4 or 0.1 € with 5–10 |
| **ROW 5** | 2 € with 1–5 or 1.6 € with 6–10 |  | 3.85 € with 1–5 or 0.1 € with 6–10 |
| **ROW 6** | 2 € with 1–6 or 1.6 € with 7–10 |  | 3.85 with 1–6 or 0.1 € with 7–10 |
| **ROW 7** | 2 € with 1–7 or 1.6 € with 8–10 |  | 3.85 € with 1–7 or 0.1 € with 8–10 |
| **ROW 8** | 2 € with 1–8 or 1.6 € with 9–10 |  | 3.85 € with 1–8 or 0.1 € with 9–10 |
| **ROW 9** | 2 € with 1–9 or 1.6 € with 10 |  | 3.85 € with 1–9 or 0.1 € with 10 |
| **ROW 10** | 2 € with 1–10 |  | 3.85 € with 1–10 |

Please answer the following questions:

What faculty are you enrolled in? ___________________________________________________

When did you enrol? (year)

When were you born (day/month/year)? _________/__________/________

Please specify where you were born and your nationality _________________________________

______________________________________________________________________________

Specify M or F

Have you attended any courses on Game Theory?

____________________________________________

If so, which courses? _______________________________________________________

Do you know what a Nash Equilibrium is? _____________________________________________

If so, in what courses did you study it?

____________________________________________

Unpacking Focality

Our notion of focal point and its properties extends well beyond the domain of equilibrium outcomes in (symmetric) coordination games. It has been shown in the paper that the share of the FP strategy is always higher than that of XFP, but in this section we try to identify the main sources of focality by investigating why some of the differences are greater than others.

There are 4 attributes of a game outcome which, intuitively, may be judged to be relevant in determining focality:

1. payoff magnitude (“significantly” greater than most of the other payoffs)

2. symmetry of payoffs

3. centrality of the cell (or positioned in the main diagonal in WL)

4. Pareto-efficiency

*Payoff magnitude* refers to the magnitude of a cell payoff, when compared with the other payoffs the same player can get elsewhere in the matrix. To be attractive, a payoff has to be higher than most other payoffs, although not necessarily the highest (which would be chosen by “maximaxi” players). For example, in DomCol_FP_low, the payoff of the focal point is “significantly” higher than the other payoffs, giving 80 ECUs (Experimental Currency Units) against 40 of the second-highest payoff. Conversely, in PD, the payoff of the focal point is not significantly higher, as in PD_FP_low there are 4 other cells which can give the row player the same payoff as the focal cell (35 ECUs).

*Symmetry of payoffs* indicates that the payoffs of the two players are identical.

*Centrality of the cell* refers to the position of the cell in the matrix. Motivated by the results of previous experiments [35], the focal point was always located at the center of the matrix, except in the WL, where (due to the presence of three symmetric cells with increasing magnitude) the symmetric cells were positioned on the main diagonal in order of decreasing payoff magnitude.

We choose *Pareto-efficiency* as an attribute instead of “Nash Equilibrium” as we assume that players do not initially reason strategically in a game-theoretical sense: therefore, we consider that it is more important for the attractiveness of an outcome to be Pareto-efficient rather than an equilibrium.

A focal point is an outcome (a cell) and not a strategy. As only choices of strategies are observed and motivations for choices are not observed, the strategies yielding a focal point were built in such a way that outcomes other than the focal point look particularly unattractive. In all games, one of the two remaining cells gives the lowest possible payoff to row players, and in all games except the WL the remaining cell yields the second lowest payoff. In addition, one of these two cells gives the highest possible payoff to column players; hence, subjects should avoid picking FP if they imagine that column players might go for their highest payoff (which in our games coincides also with the equilibrium strategy for column players).

In these games, two types of focal points can be found on the basis of the four attributes listed. The first is the focal point for games DomCol, noNE, UniqNE, and WL, which satisfies the attributes of payoff magnitude, symmetry of payoffs, centrality of the cell, and Pareto-efficiency. The second is the focal point for the PD, which satisfies symmetry of payoffs, centrality of the cell, and Pareto-efficiency, but not payoff magnitude.

We removed focal points in one of three different ways: first, as in game types DomCol, noNE, and UniqNE, by breaking the symmetry of payoffs and by reducing their magnitude, so that the cell that used to be focal satisfies only the attribute of centrality and Pareto-efficiency. Second, as in the Weak Link, by simply shifting strategy positions so as to place all the cells with symmetric payoffs outside the main diagonal. Therefore, in the Weak Link, the XFP outcome satisfies the attributes of payoff magnitude, symmetry of payoffs, and Pareto-efficiency. Third, as in the PD, by simply reducing the payoff of the column player. As both payoffs were already relatively small, the payoff decrease in this case is slight. Here XFP satisfies centrality of the cell and Pareto-efficiency (in two out of three matrices).

Table A1 lists attributes and choice shares for a sample of payoff matrices. The data clearly suggest that some of the attributes are an important source of focality whereas others are not.

**Table A1.** Attributes and choice frequencies for a sample of cells.

| **Type of focal point** | **PD_L** | | **DomCol_M** | | **WL_L** | | **PD_XFP_L** | **DomCol_XFP_L** |
| --- | --- | --- | --- | --- | --- | --- | --- | --- |
| Strategy | FP | XFP | FP | XFP | FP | XFP | DOM | XFP |
| Payoff magnitude |  |  | X |  | X | X |  | X |
| Symmetry of payoff | X |  | X |  | X | X | X |  |
| Centrality ofcell | X | X | X | X | X |  |  | X |
| Pareto efficiency | X | X | X | X | X | X |  | X |
| Frequency | 10% | 5% | 42% | 7% | 57% | 48% | 3% | 2% |

Let us first analyze PD_FP_low, in which the FP strategy is not particularly successful, being chosen only by 10% of players. As the difference with PD_XFP_low is not significant, we infer that the joint presence of symmetry of payoffs, centrality of the cell, and Pareto-efficiency is not sufficient to trigger focality. We then analyze game DomCol that represents also games noNE, and UniqNE, since their FP and XFP cells share the same attributes. The FP strategy in these games is highly attractive, reaching a share ranging from 32% to 47% in the low variance case. In addition, in all versions, the differences between FP and XFP are always significant, suggesting that symmetry of payoffs and payoff magnitude (the attributes removed in XFP) are a key source of focality. Instead, as XFP is rarely selected, it appears that Pareto-efficiency and centrality of the cell are two attributes of minor or no importance, as already indicated by data related to the PD.

In the Weak Link, FP has the strongest attractive power and, when matrices with the same features are compared, it obtains the highest share. Although the share of FP is always higher than that of XFP in the Weak Link, the difference is never significant, again indicating that centrality of the cell plays a minor role in determining focality.

Lastly, we consider the separate effects of symmetry of payoffs and payoff magnitude: although the two attributes show considerable attractive power when together, neither seems to create a focal point when alone. In PD_XFP_low, only 3% of subjects chose strategy DOM (a weakly dominated strategy), although it contains a symmetric cell yielding an “acceptable” gain to both players. Similarly, in DomCol_XFP_low, only 2% of row players chose strategy XFP, which yields the highest (although not symmetric) gain compared with other matrix cells.

Altogether, these results suggest that cell focality in a non-symmetric game is mainly due to the joint effect of payoff magnitude and symmetry of payoffs, whereas centrality of the cell and Pareto-efficiency play a minor role. The two attributes, when present in isolation, lose much of their attractive power. This finding is consistent with the results of Biel[[1]](#footnote-1), in which introducing cells with symmetric payoffs in normal form games turned out to be irrelevant in modifying players’ strategic behavior.

Thus far, we have stated that the attractiveness of a focal point is due to its structure, meaning that its features make it a “natural” cooperative choice in the absence of communication or feedback. An alternative explanation may be that the focal point is chosen being the outcome that yields the highest payoff sum. Fairness-based explanations of out-of-equilibrium play are widespread, and behavioral models such as that of Costa-Gomes *et al.* [37] include an “Altruistic” type, who systematically opts for the cell with the highest payoff sum. In order to test whether players select FP for this reason, in the following we analyze the relative attractiveness of the “fair” cell, defined as the one with the highest payoff sum.

In matrices with a focal point, the focal point is always the fair cell. In PD_FP_low, PD_FP_high and WL_FP_high, another cell yields the same payoff sum as the focal point (in strategies EQ/HA, EQ/HA, and HA). In all matrices with a focal point, the strategies corresponding to the fair outcomes are chosen by a share ranging from 32% to 87%. The only exception is PD_FP_middle, in which the strategy leading to the only fair cell—FP—is only chosen by 17% of subjects, preliminary evidence of the scarce importance of payoff sum as a choice criterion. Let us now examine fair cells in matrices without focal point. The cases of PD and WL are not informative: in PD, fair cells are always selected by the EQ/HA strategy, and another fair cell appears in XFP as well in PD_XFP_middle and PD_XFP_high. In the WL, the focal point is not really removed, but it is only shifted to a different position and this change does not affect its salience. We therefore analyze the case of games DomCol, noNE, and UniqNE. Here, the cell that used to be focal is still the fair cell in eight out of nine matrices, but the share of the corresponding strategy (XFP) ranges from 0% to a maximum of 7%, whereas in matrices with focal point the share of the associated strategy ranges from 32% to 58%. We interpret this difference as strongly supporting the hypothesis that the attractiveness of a focal point is not related to its being the cell with the highest payoff sum, but to the attributes already singled out.

Finally, further evidence of the scarce importance of fairness-driven preferences for our focal points comes from applying the model in Costa-Gomes *et al.* [37] to our data: only 4.6% of our subjects is categorized as “Altruistic” (see Section 4.2).

Concluding, the symmetry and magnitude of payoffs seem to make the focal cell an “obvious” choice for both players, triggering spontaneous coordination. Clearly, payoff symmetry makes
the focal point a fair outcome by definition (as is the result of applying the “equality rule” which Mehta *et al.* ([16]) find as the most frequently used in a series of assignment games), but we argue that subjects select it for reasons which have to do with Schelling salience ([15,16, and Bacharach[[2]](#footnote-2)]): that is, out of cognitive processes akin to those which are thought to be triggered by equilibrium focal points in games of coordination.

The last consideration concerns theories of choice in games based on collective preferences such as team reasoning. Team reasoning ([15, Bacharach[[3]](#footnote-3), and Gold and Sugden[[4]](#footnote-4)]) has been defined as a decision criterion based on collective rather than individual rationality. A player asks herself not “what do I want and what should I do to achieve it”, but rather “What do we want, and what should I do to help achieve it” (Colman *et al.*[[5]](#footnote-5), p. 389). It follows that in games with Pareto-ranked equilibria, team reasoning prescribes that players should select the payoff-dominant equilibrium, and in games other than coordination games, team reasoning prescribes to select strategies leading to the Pareto-efficient outcome (even if it is not an equilibrium); since we have shown that the attribute of Pareto-efficiency, when present alone, does not attract a significant share of preferences in our games, we can conclude that team reasoning is not able to explain our data. Team reasoning also fares worse in our games compared to other 3 × 3 games with Pareto-efficient, non-equilibrium outcomes in which it has been tested against equilibrium predictions (Colman *et al.*); in this study, the share of the strategy leading to the Pareto-efficient outcome is always the highest and always higher than 50 percent, thus predicting behavior substantially more accurately than Nash equilibrium. The main difference between the two sets of matrices is that in Colman *et al.* (Colman *et al.*) the Pareto-efficient outcome is always symmetric (i.e., a focal point, based on our definition). Therefore, by comparing our results with their results we can obtain further indirect support to the idea that payoff symmetry is a fundamental component of a focal point.

© 2013 by the authors; licensee MDPI, Basel, Switzerland. This article is an open access article distributed under the terms and conditions of the Creative Commons Attribution license (http://creativecommons.org/licenses/by/3.0/).

1. Biel, P.R. Equilibrium play and best response to (Stated) beliefs in normal form games. *Games Econ. Behav.* **2009**, *65*, 572–585. [↑](#footnote-ref-1)
2. Bacharach, M. Interactive team reasoning: A contribution to the theory of co-operation. *Res. Econ.* **1999**, *53*, 117–147. [↑](#footnote-ref-2)
3. Bacharach, M. *Beyond Individual Choice: Teams and Frames in Game Theory*; Princeton University Press: Princeton, NJ, USA, 2006. [↑](#footnote-ref-3)
4. Gold, N.; Sugden, R. Theories of Team Agency. In *Rationality and Commitment*; Peter, F., Schmid, H.B., Eds.; Oxford University Press: Oxford, UK, 2007; pp. 280–312. [↑](#footnote-ref-4)
5. Colman, A.M.; Pulford, B.D.; Rose, J. Collective rationality in interactive decisions: Evidence for team reasoning.
   *Acta Psychol.* **2008**, *128*, 387–397. [↑](#footnote-ref-5)
